# Supplementary material for: Whole genome sequencing identifies novel structural variant in a large Indian family affected with X-linked agammaglobulinemia
Source: PubMed Central journal article supplement (PMC8274882; doi:10.1371/journal.pone.0254407), 2021-07-12
Supplement: pone.0254407.s006.pdf [file pone.0254407.s006.pdf]

|                         |                   | Reference sample 1 | Reference sample 2 | III.9 | III.47 | IV.34 | IV.36 | IV.38 | IV.40 | IV.41 | IV.101 | IV.102 | IV.103 | V.14 | V.16 | V.17 | V.18 | V.19 | V.21 | V.23 |
|-------------------------|-------------------|--------------------|--------------------|-------|--------|-------|-------|-------|-------|-------|--------|--------|--------|------|------|------|------|------|------|------|
|                         | BTK-19 - 224nt    | 1                  | 1                  | 1.04  | 1.02   | 1.03  | 1.03  | 1.06  | 1.03  | 0.98  | 1.06   | 1.01   | 1.05   | 1.08 | 0.99 | 1.02 | 1.12 | 1    | 1.02 | 1.04 |
|                         | BTK-18 - 373nt    | 1                  | 1                  | 1.07  | 1.05   | 1.05  | 1.01  | 1.16  | 1.08  | 1.08  | 1.05   | 0.99   | 1.03   | 1.04 | 1.02 | 1    | 0.98 | 1.06 | 1.06 | 0.97 |
|                         | BTK-17 - 170nt    | 0.97               | 1.03               | 1.03  | 1.02   | 1.06  | 1.01  | 1.02  | 1.07  | 1.01  | 1.04   | 1      | 1.01   | 1    | 1    | 1.03 | 1.04 | 1.06 | 1.03 | 0.99 |
|                         | BTK-16 - 217nt    | 1                  | 1                  | 1.04  | 1.01   | 1.03  | 1.06  | 1.02  | 1.03  | 1.01  | 1.06   | 1.01   | 1.04   | 1.11 | 1.01 | 1    | 1.11 | 1.04 | 1.05 | 1.06 |
|                         | BTK-15 - 265nt    | 1.02               | 0.98               | 1.03  | 1.05   | 1.01  | 1.04  | 1     | 1.03  | 1.07  | 1.02   | 0.98   | 0.97   | 0.95 | 0.98 | 1.02 | 1.01 | 1.02 | 1.05 | 0.98 |
|                         | BTK-14 - 310nt    | 0.99               | 1.01               | 1.06  | 1.05   | 1     | 1.06  | 0.99  | 1.07  | 1.02  | 1.09   | 1.01   | 0.99   | 1.04 | 0.99 | 0.97 | 1.03 | 1.03 | 1.07 | 0.96 |
|                         | BTK-13 - 211nt    | 1                  | 1                  | 1.03  | 1      | 1.02  | 1     | 1.02  | 1.03  | 0.98  | 1      | 1.02   | 1.01   | 1    | 0.97 | 0.98 | 1.06 | 0.99 | 1    | 1    |
|                         | BTK-12 - 152nt    | 1                  | 1                  | 1     | 1.01   | 1.02  | 0.98  | 1.01  | 0.99  | 1.02  | 1.02   | 1.03   | 1.01   | 1    | 0.97 | 1.02 | 1.07 | 0.98 | 0.99 | 1.05 |
|                         | BTK-11 - 176nt    | 0.97               | 1.03               | 0.96  | 1.01   | 0.99  | 0.98  | 0.99  | 0.97  | 1.09  | 0.94   | 0.97   | 0.94   | 1.01 | 0.96 | 1.03 | 0.94 | 0.97 | 1.03 | 0.93 |
|                         | BTK-10 - 381nt    | 1.02               | 0.98               | 1.03  | 1.1    | 1.04  | 1.07  | 1.07  | 1.11  | 1.09  | 1.05   | 1.01   | 1.07   | 1.07 | 0.99 | 1.05 | 1.02 | 1.06 | 1.09 | 1    |
|                         | BTK-9 - 250nt     | 1                  | 1                  | 1.07  | 1.06   | 1.06  | 1.06  | 1.03  | 1.07  | 1.05  | 1.11   | 1      | 1.02   | 1.08 | 1    | 1.03 | 1.04 | 1.08 | 1.12 | 0.97 |
|                         | BTK-8 - 301nt     | 1.03               | 0.97               | 1.1   | 1.13   | 1.06  | 1.07  | 1.07  | 1.07  | 0.99  | 1.12   | 1.08   | 1.11   | 1.08 | 1.01 | 1.04 | 1.11 | 1.03 | 1.05 | 1.1  |
|                         | BTK-7 - 201nt     | 1.01               | 0.99               | 0.95  | 0.95   | 1.01  | 0.97  | 1.01  | 0.97  | 0.98  | 0.96   | 1.01   | 1      | 1.01 | 1    | 0.97 | 1.01 | 0.97 | 0.97 | 0.98 |
|                         | BTK-6 - 137nt     | 1                  | 1                  | 0.99  | 0.95   | 0.99  | 0.96  | 0.99  | 0.98  | 1     | 0.96   | 1.02   | 1.02   | 1.01 | 1    | 1    | 1.05 | 0.96 | 0.98 | 1.01 |
|                         | BTK-5 - 361nt     | 0.99               | 1.01               | 0.54  | 0.55   | 1.01  | 0.54  | 1.05  | 0.54  | 1.06  | 0      | 1      | 1.01   | 0    | 0.52 | 0.56 | 0    | 1.08 | 1.06 | 0    |
|                         | BTK-4 - 349nt     | 1.01               | 0.99               | 0.57  | 0.52   | 1.02  | 0.53  | 1.01  | 0.49  | 0.92  | 0      | 1.01   | 1.03   | 0    | 0.53 | 0.54 | 0    | 1.03 | 1.01 | 0    |
|                         | BTK-3 - 243nt     | 0.99               | 1.01               | 0.58  | 0.56   | 1     | 0.54  | 0.97  | 0.52  | 1.02  | 0      | 1.02   | 0.98   | 0    | 0.53 | 0.57 | 0    | 1.02 | 1.08 | 0    |
|                         | BTK-2 - 196nt     | 1                  | 1                  | 1.05  | 0.99   | 1.01  | 1.04  | 1.02  | 1.01  | 0.95  | 1.05   | 1      | 1.03   | 1.1  | 0.97 | 0.99 | 1.11 | 1.02 | 1.02 | 1.04 |
|                         | BTK-1 - 164nt     | 1                  | 1                  | 1     | 0.99   | 1.03  | 1.01  | 1.03  | 1.02  | 0.95  | 1.03   | 1      | 1.03   | 1.05 | 0.99 | 0.98 | 1.08 | 1.01 | 1    | 1.04 |
|                         | RPL36A-5 - 330nt  | 0.98               | 1.02               | 1.01  | 1      | 1     | 1     | 0.95  | 0.99  | 1     | 0.92   | 0.96   | 0.95   | 1.07 | 0.97 | 0.98 | 0.93 | 1    | 1.02 | 0.95 |
| <b>Test probes</b>      | GLA-6 - 229nt     | 0.98               | 1.02               | 1.02  | 0.96   | 1     | 1.03  | 0.97  | 0.97  | 0.97  | 0.96   | 1      | 0.97   | 1.01 | 0.98 | 0.99 | 1.01 | 0.99 | 0.98 | 0.99 |
|                         | Reference - 130nt | 0.97               | 1.03               | 0.95  | 0.98   | 1     | 0.98  | 0.99  | 0.94  | 1.05  | 0.95   | 0.98   | 0.93   | 1.05 | 0.97 | 1    | 0.95 | 0.96 | 1.01 | 0.98 |
|                         | Reference - 391nt | 1.01               | 0.99               | 1.06  | 1.07   | 1.01  | 1.11  | 1.06  | 1.04  | 0.98  | 1.09   | 1.06   | 1.06   | 1.03 | 1.02 | 0.99 | 1.05 | 1.02 | 1.07 | 1.04 |
|                         | Reference - 190nt | 1                  | 1                  | 1.01  | 1.03   | 1.02  | 1.03  | 1.03  | 0.95  | 0.95  | 1.03   | 1      | 1.02   | 1.05 | 1    | 1.01 | 1.02 | 0.99 | 1    | 1.02 |
|                         | Reference - 155nt | 1                  | 1                  | 0.99  | 1      | 0.97  | 0.95  | 0.98  | 1.05  | 1.05  | 1      | 0.98   | 0.97   | 0.98 | 1.01 | 0.99 | 1    | 1.04 | 1    | 0.97 |
|                         | Reference - 337nt | 1                  | 1                  | 0.98  | 1      | 1     | 0.98  | 1.01  | 0.99  | 1.01  | 0.98   | 0.97   | 0.96   | 0.93 | 0.99 | 1.03 | 0.97 | 1    | 0.99 | 0.99 |
|                         | Reference - 319nt | 0.99               | 1.01               | 1.02  | 1.01   | 0.99  | 1     | 0.98  | 1.02  | 0.95  | 1.03   | 1.02   | 1.03   | 1.03 | 1.01 | 0.97 | 1.05 | 1    | 0.99 | 1.01 |
|                         | Reference - 283nt | 1                  | 1                  | 1.02  | 1      | 1     | 0.99  | 1     | 1.02  | 1.02  | 1      | 1      | 1      | 0.98 | 1    | 0.98 | 1    | 1.01 | 1.02 | 0.98 |
| <b>Reference probes</b> | Reference - 256nt | 1                  | 1                  | 0.95  | 0.96   | 1.05  | 1.01  | 0.99  | 0.95  | 0.99  | 0.94   | 0.99   | 1      | 0.98 | 0.95 | 1.02 | 0.97 | 0.93 | 0.96 | 1    |
